# Supplementary material for: Oncolytic vaccinia virus GLV-1h68 strain shows enhanced replication in human breast cancer stem-like cells in comparison to breast cancer cells
Source: PubMed Central journal article supplement (PMC3478222; doi:10.1186/1479-5876-10-167), 2012-08-17
Supplement: 1479-5876-10-167-S1.pdf [file 1479-5876-10-167-S1.pdf]

**Table S1. Source, clinical, pathological and molecular features of breast cancer cell lines used in this study.**

| Cell line    | Gene cluster [1] | ER   | PR  | HER2 | TP53              | Source | Tumor type    | Age (years) | Ethnicity | Tumorigenicity | Culture media        | Culture conditions       | Ref   |
|--------------|------------------|------|-----|------|-------------------|--------|---------------|-------------|-----------|----------------|----------------------|--------------------------|-------|
| 1 GI-101A    | Lu               | +/-* | -   | +    | + <sup>M</sup>    | XG     | IDC           | 57          |           | Y              | RPMI, 20% FBS        | 37°C, 5% CO <sub>2</sub> | [2-4] |
| 2 MCF-7      | Lu               | +    | [-] | Low  | +/- <sup>WT</sup> | PE     | IDC           | 69          | W         | Y**            | RPMI, 20% FBS        | 37°C, 5% CO <sub>2</sub> | [5]   |
| 3 MDA-MB-231 | BaB              | -    | [-] | -    | ++ <sup>M</sup>   | PE     | AC            | 51          | W         | Y              | DMEM, 10% FBS        | 37°C, 5% CO <sub>2</sub> | [6]   |
| 4 Hs 578T    | BaB              | -    | [-] |      | + <sup>M</sup>    | P.Br   | IDC           | 74          | W         | N              | RPMI, 20% FBS        | 37°C, 5% CO <sub>2</sub> | [7]   |
| 5 SUM149PT   | BaB              | [-]  | [-] | -    | [+]               | P.Br   | Inf Duc.Ca*** |             |           | Y              | Ham's F12, 5% FBS-IH | 37°C, 5% CO <sub>2</sub> | [8]   |

AC, adenocarcinoma; BaB, Basal B; Duc.Ca, ductal carcinoma; IDC, invasive ductal carcinoma; Inf, inflammatory; Lu, luminal; P.Br, primary breast; PE, pleural effusion; W, White.

ER/PR/HER2/TP53 status: ER/PR positivity, HER2 overexpression, and TP53 protein levels and mutational status (obtained from the Sanger web site; M, mutant protein; WT, wild-type protein) are indicated; XG, xenograft.

Square brackets indicate that levels are inferred from mRNA levels alone where protein data is not available.

Media conditions: FBS, fetal bovine serum; I, Insulin (5µg/ml); H, hydrocortisone (1µg/ml); DMEM, Dulbecco's modified Eagle's medium; RPMI, RPMI medium 1640; Ham's F12, F-12 nutrient mixture (Ham).

\* Positive in mRNA levels and negative in protein level.

\*\*With estrogen supplement.

\*\*\*Information obtained on Asterand website (<http://solutions.asterand.com/Human-Cell-Lines-s/1.htm>).

1. Neve RM, Chin K, Fridlyand J, Yeh J, Baehner FL, Fevr T, Clark L, Bayani N, Coppe JP, Tong F, et al: **A collection of breast cancer cell lines for the study of functionally distinct cancer subtypes.** *Cancer Cell* 2006, **10**:515-527.
2. Rathinavelu P, Malave A, Raney SR, Hurst J, Roberson CT, Rathinavelu A: **Expression of mdm-2 oncoprotein in the primary and metastatic sites of mammary tumor (GI-101) implanted athymic nude mice.** *Cancer Biochem Biophys* 1999, **17**:133-146.
3. Morrissey JJ, Raney S: **A metastatic breast tumor cell line, GI-101A, is estrogen receptor positive and responsive to estrogen but resistant to tamoxifen.** *Cell Biol Int* 1998, **22**:413-419.
4. Hurst J, Maniar N, Tombarkiewicz J, Lucas F, Roberson C, Steplewski Z, James W, Perras J: **A novel model of a metastatic human breast tumour xenograft line.** *Br J Cancer* 1993, **68**:274-276.
5. Osborne CK, Hobbs K, Trent JM: **Biological differences among MCF-7 human breast cancer cell lines from different laboratories.** *Breast Cancer Res Treat* 1987, **9**:111-121.
6. Cailleau R, Olive M, Cruciger QV: **Long-term human breast carcinoma cell lines of metastatic origin: preliminary characterization.** *In Vitro* 1978, **14**:911-915.
7. Lacroix M, Leclercq G: **Relevance of breast cancer cell lines as models for breast tumours: an update.** *Breast Cancer Res Treat* 2004, **83**:249-289.
8. van Golen KL, Wu ZF, Qiao XT, Bao LW, Merajver SD: **RhoC GTPase, a novel transforming oncogene for human mammary epithelial cells that partially recapitulates the inflammatory breast cancer phenotype.** *Cancer Res* 2000, **60**:5832-5838.
